# Supplementary material for: MicroRNA-21 Plays Multiple Oncometabolic Roles in Colitis-Associated Carcinoma and Colorectal Cancer via the PI3K/AKT, STAT3, and PDCD4/TNF-α Signaling Pathways in Zebrafish
Source: MDPI journal article supplement (doi:10.3390/cancers13215565), 2021-11-06
Supplement: s1 [file s1]

# Supplementary Materials: MicroRNA-21 Plays Multiple On-cometabolic Roles in Coli-tis-Associated Carcinoma and Colorectal Cancer via the PI3K/AKT, STAT3, and PDCD4/TNF- $\alpha$ Signaling Pathways

Chi-Yu Lai, Kun-Yun Yeh, Bi-Feng Liu, Tzu-Ming Chang, Chuan-Hsun Chang, Yung-Feng Liao, Yi-Wen Liu and Guor Mour Her.

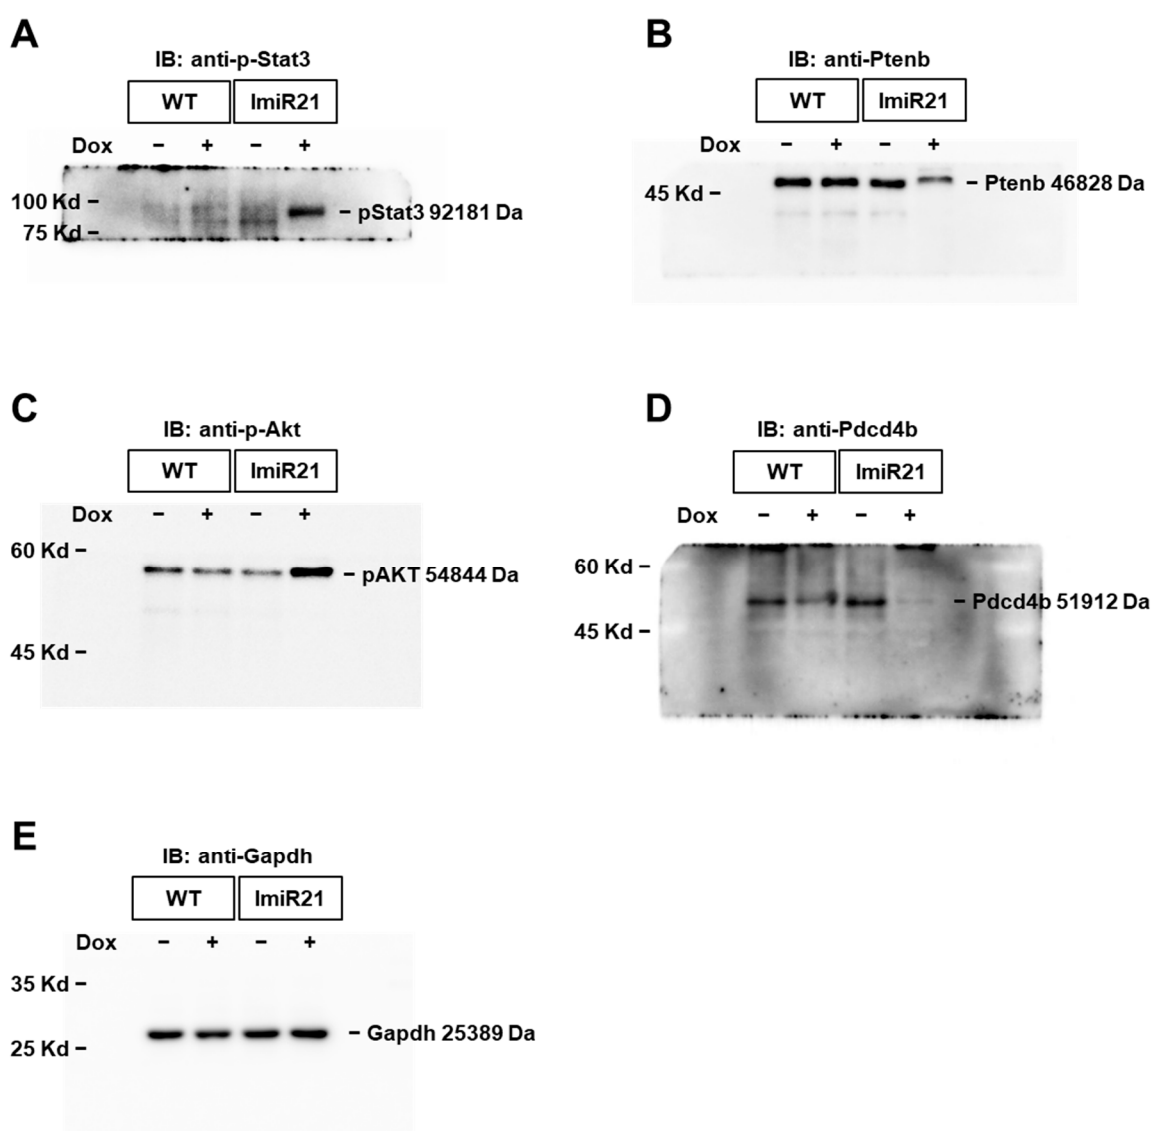

**Figure S1.** Raw western blots of (A) phosphorylated (p)-Stat3, (B) Ptenb, (C) p-Akt, (D) Pdcd4b, and (E) Gapdh in intestines of WT  $\pm$  Dox and ImiR-21  $\pm$  Dox zebrafish at 6 mpf/1 mpt (months post-treatment).

**A**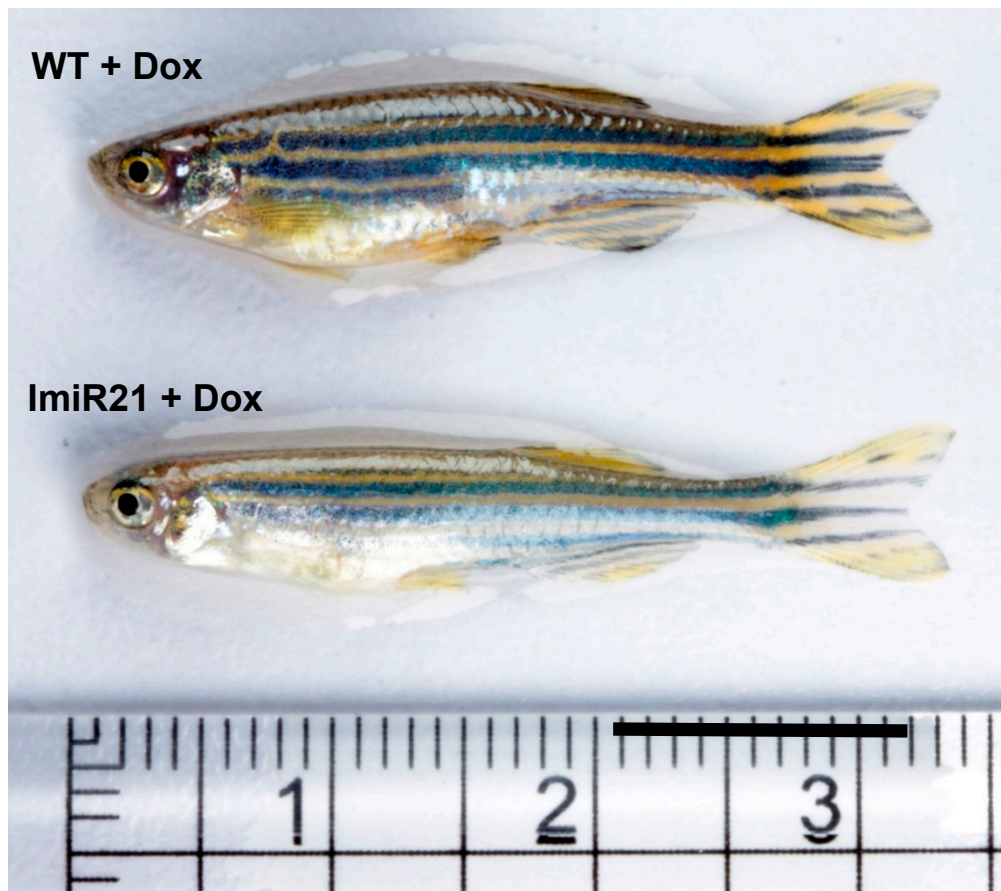**B**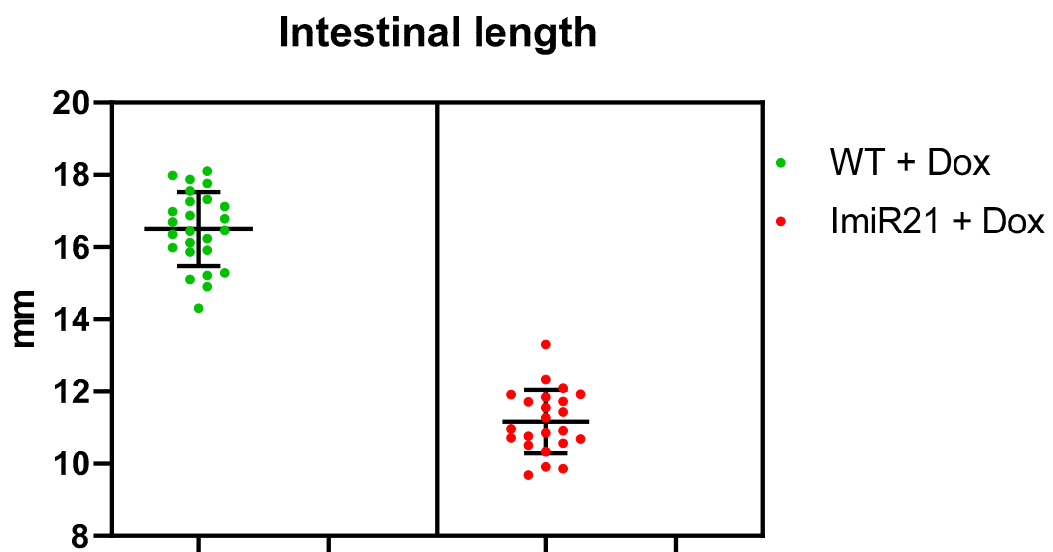

**Figure S2.** Dysregulated miR-21 leads to short bowel syndrome. (A) Representative images of morphology of WT + Dox and ImiR-21 + Dox at 7 mpf/2 mpt. ImiR-21 + Dox zebrafish were weaker and more marasmic than WT + Dox. (B) Representative images of intestinal length of WT + Dox and ImiR-21 + Dox at 7 mpf/2 mpt.

**Table S1.** Primer sequences used for quantitative RT-PCR.

| Gene.            | Accession                   | Forward Primer                                                        | Reverse Primer          |
|------------------|-----------------------------|-----------------------------------------------------------------------|-------------------------|
| <i>gapdh</i>     | NM_001115114.1              | GTGGAGTCTACTGGTGTCTTC                                                 | GTGCAGGAGGCATTGCTTACA   |
| <i>U6</i>        |                             | TTGGTCTGATCTGGCACATATAC                                               | AAAAATATGGAGCGCTTCACG   |
| <i>miR-21-RT</i> | NR_030020.1 and NR_030021.2 | GAAAGAAGGCGAGGAGCAGATCGAGGAAGAAGACGGAA-GAATGTGCGTCTCGCCTTCTTCGCCAACAC |                         |
| <i>miR-21</i>    |                             | GCAGCTAGCTTATCAGACTGGTGT                                              | CGAGGAAGAAGACGGAAGAAT   |
| <i>adipoqa</i>   | XM_009297486                | CTGAAAGGAGAAAGTGGAGAGG                                                | GTAAGAAGTTTTGGTGAAGCG   |
| <i>adipor1a</i>  | XM_005169284                | GGAGAAGATGGAGGAGTTTGTG                                                | AAACAGGCACGGAAGGAG      |
| <i>adipoR1-A</i> | NM_0010024678               | TGTGCATAAGGTTTGGGAGG                                                  | AGGTAGTCGTTGTCTTTAGCC   |
| <i>adipoR1-B</i> | BC044388                    | GTCTGTCTGATGTGTTCTGGG                                                 | GGTAAAGTGCATTGTGGGAAC   |
| <i>adipoR2</i>   | BC154262                    | CGCCATCACAGTATCCCAG                                                   | CAATCATAAAGTGCAGCGTGG   |
| <i>adipor2</i>   | NM_001025506                | TCTCTGTTCTCTATTTTGGCCC                                                | CCATCAAACAGCAATAGACCAAG |
| <i>apelin</i>    | NM_001166124                | TCTTTGGGCAACCGTGAATAC                                                 | CGTTCTGACCTACTGATCCATG  |
| <i>btg2</i>      | NM_130922.2                 | CGCAGCTCCAGGTGTCA                                                     | AATGGTGCTAGTGTCTCTGAGA  |
| <i>cd4-1</i>     | NM_001135096.1              | GTCACCTACCCAGAGAAAAAG                                                 | TGCGTTTGTCCCCTTACTG     |
| <i>cd8a</i>      | NM_001040049.1              | TCGGAGGTTGTGGACTTTTC                                                  | GTGGGCATTTTCGCATGAC     |
| <i>cyp7a1</i>    | NM_201173                   | GATCCATTCTCCTACCATTGCTG                                               | GGTGTAACCTTGACTGGGATC   |
| <i>hp</i>        | XM_689364.3                 | ACGGAAGTAGCAGTGGAAAAG                                                 | GGAAGTGGGATGGGCAATATAG  |
| <i>il-11b</i>    | XM_021468285                | ACGGAATAGTGACGAATTGGG                                                 | CAATGTGGGATGGACGATCTC   |
| <i>il-11b</i>    | NM_212844                   | TGGCGAACGTCATCCAAG                                                    | GGAGCACTGGGCGACGCATA    |
| <i>il-13</i>     | NM_001199905                | CCCAAAAGAGACAAAAGGCAAAAG                                              | CAAATTTGACACCGGACAGG    |
| <i>il-1b</i>     | AY340959.1                  | TCAAACCCCAATCCACAGAG                                                  | TCACCTCACGCTCTTGGATG    |
| <i>il-1b</i>     | XM_021468285                | ACGGAATAGTGACGAATTGGG                                                 | CAATGTGGGATGGACGATCTC   |
| <i>il-23a</i>    | FN869917                    | ATGATCAGGAATCGGCAGTG                                                  | GAGAAGCCAGGTATGAGAACAC  |
| <i>il-23r</i>    | NM_001113506                | CAATGGCATTTACACCCCTG                                                  | TTCTTGGCTCAGTTCATCCC    |
| <i>il-2rga</i>   | NM_001128271                | GCTGAATTGTGGCTTTACTGG                                                 | AAACTGTATGTGGTCTGACG    |
| <i>il-2rgb</i>   | NM_001123050                | GAGCCGTCCTGTGATGTATG                                                  | AGATTTTCGGTTTGAGGACAGG  |
| <i>il-6</i>      | NM_001261449.1              | CAGAGACGAGCAGTTTGAGAG                                                 | AGACATCTTTCCGTGCTGAAG   |
| <i>il-8a</i>     | XM_009306855.3              | CATTGAAACAGAAAGCCGACG                                                 | GATCTCCTGTCCAGTTGTCATC  |
| <i>map3k8</i>    | XM_687085                   | AGGACACCAAAACTCGGAAG                                                  | CACAGCAAGGCCCATATAG     |
| <i>muc2.1</i>    | XM_021470771                | CCAAGATGAAGGACAAGGAGAG                                                | GGAGAAAACCGTACACAGACA   |
| <i>nf-kb2</i>    | NM_001001840.3              | ATGACGAGCCTCTTTTCCTG                                                  | TCTCTTCCGTGGGTAAACAC    |
| <i>pdc4b</i>     | NM_198978.1                 | TCAGATGAGACGGGGCTTTG                                                  | CTTACGGCCCCGACTAGGAC    |
| <i>smad7</i>     | NM_175082.3                 | ACCAGACAGTTTCATCAGCAG                                                 | ATCCTCTGGAGAACAACCGG    |
| <i>tnfa</i>      | NM_212859.2                 | GGTGTGTTGGGATCATTGTC                                                  | GCCTTGGAAAGTGAATTGCC    |
| <i>tpm1</i>      | XM_005174375.4              | TGAGCAGGCTGAGGGAGA                                                    | CGACGCTCTGGTACTCCT      |

**Table S2.** Number of zebrafish larvae for survival analysis.

| <i>n</i> = 100, 3 independent experiments for every analysis |       |       |       |         |       |
|--------------------------------------------------------------|-------|-------|-------|---------|-------|
| WT-non injected                                              | I     | II    | III   | Average |       |
| dpf / dpi                                                    | Death | Death | Death | Raw     | Round |
| 14 / 0                                                       | 0     | 0     | 0     | 0.00    | 0     |
| 15 / 1                                                       | 1     | 0     | 0     | 0.33    | 0     |
| 16 / 2                                                       | 0     | 0     | 1     | 0.33    | 0     |
| 17 / 3                                                       | 1     | 1     | 0     | 0.67    | 1     |
| 18 / 4                                                       | 2     | 1     | 2     | 1.67    | 2     |
| 19 / 5                                                       | 0     | 0     | 1     | 0.33    | 0     |
| 20 / 6                                                       | 1     | 2     | 2     | 1.67    | 2     |
| 21 / 7                                                       | 1     | 1     | 1     | 1.00    | 1     |
| WT-PBS                                                       | I     | II    | III   | Average |       |
| dpf / dpi                                                    | Death | Death | Death | Raw     | Round |
| 14 / 0                                                       | 0     | 0     | 0     | 0.00    | 0     |
| 15 / 1                                                       | 2     | 1     | 2     | 1.67    | 2     |
| 16 / 2                                                       | 3     | 3     | 3     | 3.00    | 3     |
| 17 / 3                                                       | 2     | 1     | 1     | 1.33    | 1     |
| 18 / 4                                                       | 1     | 0     | 0     | 0.33    | 0     |
| 19 / 5                                                       | 1     | 1     | 0     | 0.67    | 1     |

|                     |              |              |              |                |              |
|---------------------|--------------|--------------|--------------|----------------|--------------|
| 20 / 6              | 1            | 0            | 1            | 0.67           | 1            |
| 21 / 7              | 1            | 1            | 0            | 0.67           | 1            |
| <b>WT-DSS</b>       | <b>I</b>     | <b>II</b>    | <b>III</b>   | <b>Average</b> |              |
| <b>dpf / dpi</b>    | <b>Death</b> | <b>Death</b> | <b>Death</b> | <b>Raw</b>     | <b>Round</b> |
| 14 / 0              | 0            | 0            | 0            | 0.00           | 0            |
| 15 / 1              | 9            | 5            | 5            | 6.33           | 6            |
| 16 / 2              | 9            | 6            | 5            | 6.67           | 7            |
| 17 / 3              | 3            | 2            | 2            | 2.33           | 2            |
| 18 / 4              | 3            | 4            | 2            | 3.00           | 3            |
| 19 / 5              | 10           | 11           | 8            | 9.67           | 10           |
| 20 / 6              | 7            | 9            | 6            | 7.33           | 7            |
| 21 / 7              | 12           | 17           | 13           | 14.00          | 14           |
| <b>ImiR21 - Dox</b> | <b>I</b>     | <b>II</b>    | <b>III</b>   | <b>Average</b> |              |
| <b>dpf / dpi</b>    | <b>Death</b> | <b>Death</b> | <b>Death</b> | <b>Raw</b>     | <b>Round</b> |
| 14 / 0              | 0            | 0            | 0            | 0.00           | 0            |
| 15 / 1              | 0            | 1            | 0            | 0.33           | 0            |
| 16 / 2              | 1            | 1            | 0            | 0.67           | 1            |
| 17 / 3              | 0            | 2            | 1            | 1.00           | 1            |
| 18 / 4              | 0            | 1            | 0            | 0.33           | 0            |
| 19 / 5              | 1            | 1            | 1            | 1.00           | 1            |
| 20 / 6              | 0            | 0            | 1            | 0.33           | 0            |
| 21 / 7              | 0            | 2            | 1            | 1.00           | 1            |
| <b>ImiR21 + AOM</b> | <b>I</b>     | <b>II</b>    | <b>III</b>   | <b>Average</b> |              |
| <b>dpf / dpi</b>    | <b>Death</b> | <b>Death</b> | <b>Death</b> | <b>Raw</b>     | <b>Round</b> |
| 14 / 0              | 0            | 0            | 0            | 0.00           | 0            |
| 15 / 1              | 6            | 7            | 6            | 6.33           | 6            |
| 16 / 2              | 2            | 3            | 3            | 2.67           | 3            |
| 17 / 3              | 4            | 6            | 5            | 5.00           | 5            |
| 18 / 4              | 14           | 17           | 15           | 15.33          | 15           |
| 19 / 5              | 8            | 9            | 8            | 8.33           | 8            |
| 20 / 6              | 4            | 6            | 5            | 5.00           | 5            |
| 21 / 7              | 9            | 12           | 10           | 10.33          | 10           |
| <b>ImiR21 + Dox</b> | <b>I</b>     | <b>II</b>    | <b>III</b>   | <b>Average</b> |              |
| <b>dpf / dpi</b>    | <b>Death</b> | <b>Death</b> | <b>Death</b> | <b>Raw</b>     | <b>Round</b> |
| 14 / 0              | 0            | 0            | 0            | 0.00           | 0            |
| 15 / 1              | 0            | 1            | 0            | 0.33           | 0            |
| 16 / 2              | 3            | 6            | 4            | 4.33           | 4            |
| 17 / 3              | 6            | 7            | 7            | 6.67           | 7            |
| 18 / 4              | 5            | 4            | 4            | 4.33           | 4            |
| 19 / 5              | 2            | 2            | 3            | 2.33           | 2            |
| 20 / 6              | 5            | 4            | 7            | 5.33           | 5            |
| 21 / 7              | 6            | 6            | 7            | 6.33           | 6            |
